# Supplementary material
Source: PubMed Central journal article supplement (PMC6282172)
Supplement: NIHMS995131-supplement-Supp_info.pdf [file NIHMS995131-supplement-Supp_info.pdf]

Supplemental materials

## Alternative splicing of the *Caenorhabditis elegans lev-11* tropomyosin gene is regulated in a tissue-specific manner

Eichi Watabe<sup>1</sup>, Shoichiro Ono<sup>2</sup>, and Hidehito Kuroyanagi<sup>1</sup>

<sup>1</sup>Laboratory of Gene Expression, Medical Research Institute, Tokyo Medical and Dental University, Tokyo, Japan

<sup>2</sup>Department of Pathology, Department of Cell Biology, and Winship Cancer Institute, Emory University, Atlanta, Georgia 30322, USA

Supplemental Figure S1

Supplemental Tables S1-S3

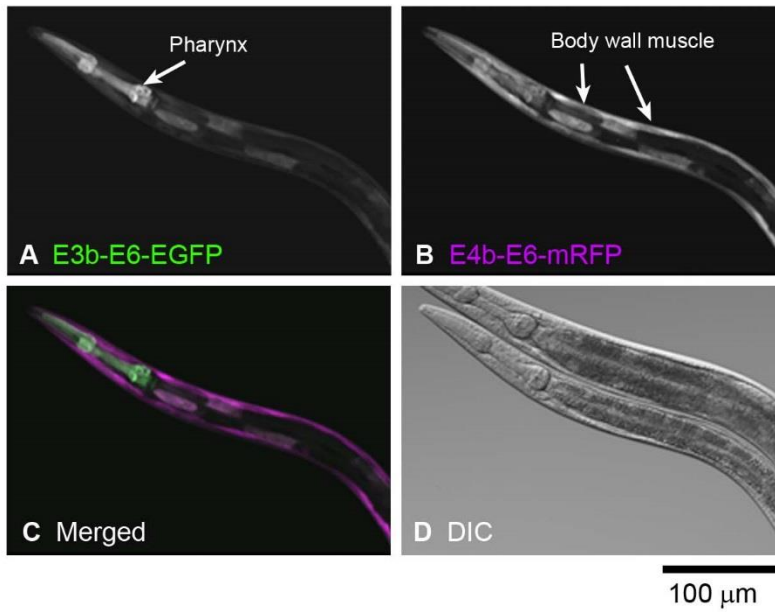

**Supplemental Fig. S1. Fluorescence splicing reporter analysis for *lev-11* E4s and E5s using a ubiquitous promoter.** The reporter minigenes, LEV-11 E3b-E6-EGFP and LEV-11 E4b-E6-mRFP (see Fig. 3 for the structures), were examined under the control of the ubiquitous *eef-1A.1* promoter. Fluorescence images show expression of E3b-E6-EGFP (A) and E4b-E6-mRFP (B) in L4 larvae. A merged image of EGFP in green and mRFP in magenta (C) and a DIC image (D) are shown. Bars, 100  $\mu\text{m}$ .

---

**Supplemental Table S1. Worm strains**

---

| Strain | Transgene                                            | Genotype                                                                                                                                             |
|--------|------------------------------------------------------|------------------------------------------------------------------------------------------------------------------------------------------------------|
| KH1506 | E3b-E6-EGFP<br>E4b-E6-mRFP<br>in all tissues         | <i>lin-15 (n765) X; ybEx1506 [eef-1A.1::LEV-11E3b-E6-EGFP eef-1A.1::LEV-11E4b-E6-mRFP lin-15(+)]</i>                                                 |
| KH1866 | E5a-ECFP<br>E5b-Venus<br>E5c-HcRed<br>in all tissues | <i>lin-15 (n765) X; ybEx1866 [eef-1A.1::LEV-11E4aE4bxE5aE6-ECFP eef-1A.1::LEV-11E4aE4bxE5bE6-VENUS eef-1A.1::LEV-11E4aE4bxE5cE6-HcRed lin-15(+)]</i> |
| KH2171 | E9a-mCherry<br>ΔE9a-EGFP<br>in all tissues           | <i>ybEx2171 [eef-1A.1::LEV-11E8E9aE9b-GGS6-EGFP eef-1A.1::LEV-11E8E9aE9b-(+1)GGS6-mCherry lin-15 (+) pRG5271Neo]</i>                                 |
| KH2445 | E3b-E6-EGFP<br>E4b-E6-mRFP<br>in body wall muscles   | <i>smg-2 (yb979) I; ybEx2445 [myo-3::LEV-11E3b-E6-EGFP myo-3::LEV-11E4b-E6-mRFP pBSKII(-)]</i>                                                       |
| KH2447 | E3b-E6-EGFP<br>E4b-E6-mRFP<br>in pharyngeal muscles  | <i>smg-2 (yb979) I; ybEx2447 [myo-2::LEV-11E3b-E6-EGFP myo-2::LEV-11E4b-E6-mRFP pBSKII(-)]</i>                                                       |
| KH2449 | E3b-E6-EGFP<br>E4b-E6-mRFP<br>in neurons             | <i>smg-2 (yb979) I; ybEx2449 [rgef-1::LEV-11E3b-E6-EGFP rgef-1::LEV-11E4b-E6-mRFP pBSKII(-)]</i>                                                     |
| KH2479 | E3b-E6-EGFP<br>E4b-E6-mRFP<br>in intestine           | <i>smg-2 (yb979) I; ybEx2479 [gst-42::LEV-11E3b-E6-EGFP gst-42::LEV-11E4b-E6-mRFP pBSKII(-)]</i>                                                     |

---

---

**Supplemental Table S2. Sequences of the primers used to detect endogenous LEV-11 mRNAs in the RT-PCR assays and molecular cloning.**

---

| Position             | Direction | Sequence                                    |
|----------------------|-----------|---------------------------------------------|
| Exon 1 <sup>1</sup>  | Forward   | 5'- <u>CACCAT</u> GGACGCCATTAAGAAGAAGATG-3' |
| Exon 3b <sup>1</sup> | Forward   | 5'- <u>CACCAT</u> GTTCGAAGGTAAACAAGGAGG-3'  |
| Exon 9a              | Reverse   | 5'-TCTCCTGGACGGTCTGTTCG-3'                  |
| Exon 9b              | Reverse   | 5'-TCATCATCTCACACAGCAAGTGA-3'               |
| Exon 9c              | Reverse   | 5'-TTAATATCCGGAGAGCTCTTGGAAG-3'             |

---

<sup>1</sup>Underlines indicate CACC sequences for directional TOPO cloning.

---

---

**Supplemental Table S3. Sequences of primers used in plasmid construction.**

---

Primers used to amplify genomic fragments.

---

| Amplified fragments            | Sequence                                                                                                        |
|--------------------------------|-----------------------------------------------------------------------------------------------------------------|
| <i>lev-11</i> exon 3b – exon 6 | 5' - <u>AAAAGCAGGCT</u> ctagacaccATGgGTCAGGCCCGTGAG-3'<br>5' -CCATGGTGGCTCTAGACTCTCCGGCCTCGGCACG-3'             |
| <i>lev-11</i> exon 4a – exon 6 | 5' - <u>AAAAAGCAGGCT</u> ccaccatgGTGCTTGTGGAGGAGGAC-3'<br>5' - <u>TATACAAAGTTGTCTCTCCGGCCTCGGCACG</u> -3'       |
| <i>lev-11</i> exon 4b – exon 6 | 5' - <u>AAAAGCAGGCT</u> ctagacaccATGgCCCTCCTCGAGGAAGA-3'<br>5' -CCATGGTGGCTCTAGACTCTCCGGCCTCGGCACG-3'           |
| <i>lev-11</i> exon 8 – exon 9b | 5' - <u>AAAAAGCAGGCT</u> ccaccatgGAGGTCGACAGACTCGAAG-3'<br>5' - <u>TATACAAAGTTGCACGGAGTTCTGAAATATTGAGTC</u> -3' |

---

Underlines indicate parts of *attB* sequences for BP cloning or *Xba* I recognition site (exon 6 Reverse). Lower case indicates nucleotides for introducing Kozak's consensus.

---

Primers used for mutagenesis.

---

| Mutation                                  | Sequence                                                                                  |
|-------------------------------------------|-------------------------------------------------------------------------------------------|
| <i>lev-11</i> exon 4b – 5' splice site    | 5' -GACGAA <u>TCTGAGCG</u> aTAtGCaTTGAGATGAG-3'<br>5' -CTCATCTCAAtGCaTAtCGCTCAGAtTCGTC-3' |
| <i>lev-11</i> exon 5a – termination codon | 5' -TGCCA <u>ACTTCCT</u> CtAGACTCAAGTCGA-3'<br>5' -TCGACTTGAGTCTaGAGGAAGTTGGCA-3'         |
| <i>lev-11</i> exon 5c – termination codon | 5' -GAGCAATCAGATTTaAaATGGATGATGACA-3'<br>5' -TGTCATCATCCATtTaAATCTGATTGCTC-3'             |
| <i>lev-11</i> exon 5b – termination codon | 5' -GGAGCGCGCCAACtaaGTTGAGGCCCAAC-3'<br>5' -GTTGGGCCTCAACttaGTTGGCGCGCTCC-3'              |
| <i>lev-11</i> exon 9a – termination codon | 5' -GATCCAAGGATCCcAAATAGTACGGTA-3'<br>5' -TACCGTACTATTTgGGATCCTTGGATC-3'                  |

---

Lower case indicates nucleotides for disrupting potential splice sites (exon 4b), introducing termination codons (exon 5s), or disrupting a termination codon (exon 9b).

---
